# Supplementary material for: Process, spatial pattern and impacts of 1743 Extreme heat: From the perspective of historical documents
Source: Copernicus journal article supplement (doi:10.5194/cp-2024-3), 2024-01-25
Supplement: Supplementary file [file cp-2024-3-AC1-supplement.pdf]

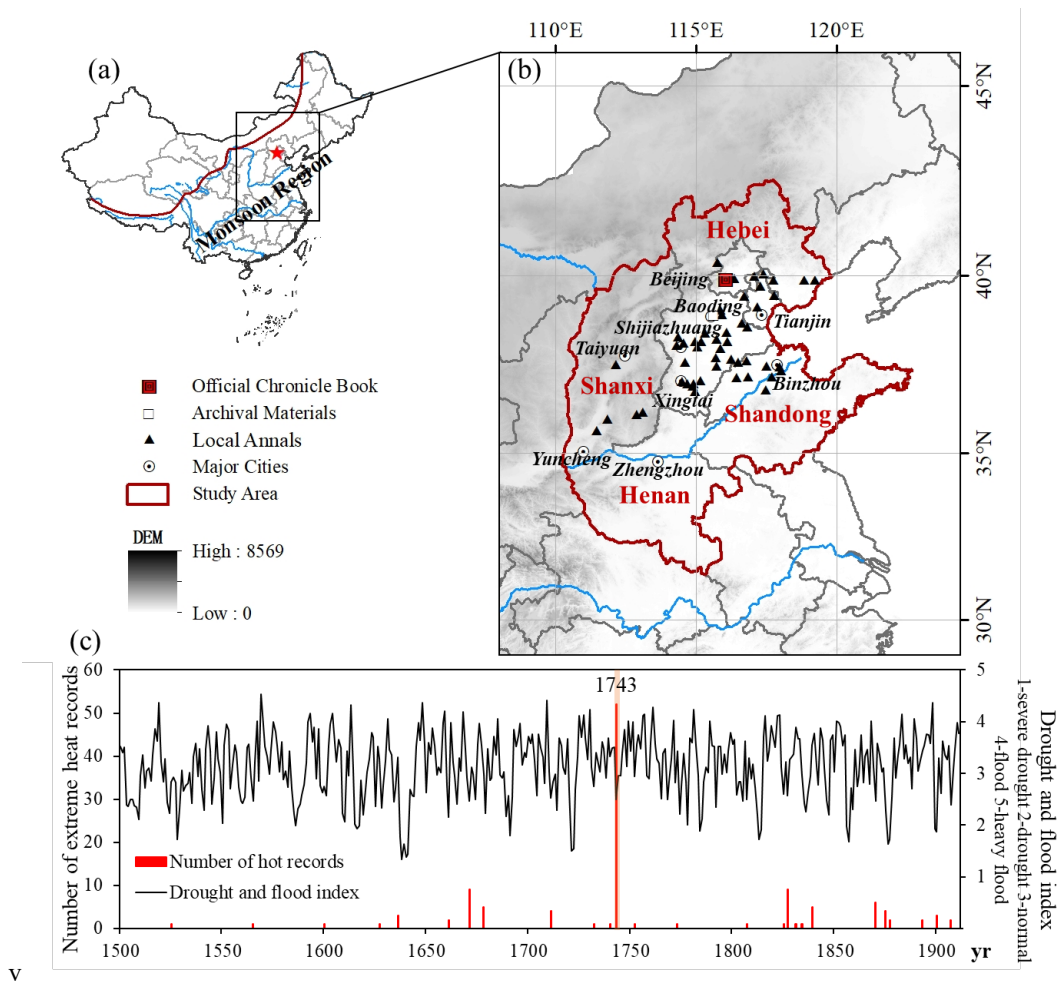

**Figure 1: Study area and data distribution in this study**

(a) Location of the study area in China; (b) Study area and data distribution; (c) Temporal scenarios of the number of hot records and drought and flood index in the study area, 1500-1911 (Tao et al., 2021; Hao et al., 2022).
