# Supplementary material for: Process, spatial pattern and impacts of 1743 Extreme heat: From the perspective of historical documents
Source: Copernicus journal article supplement (doi:10.5194/cp-2024-3), 2024-01-25
Supplement: Supplementary file [file cp-2024-3-RC2-supplement.pdf]

Process. Spatial pattern and impacts of 1793 extreme heat: from the perspective of historical documents.

Authors: Le Tao, Yun Su, Xudong Chen, Fangyu Tian

General comments

I liked this article for the meticulous search of information to characterize the severity and the regional extend of an intense heat wave that occurred in northern China almost 300 years in the past. I suggest to put in the title the location of the episode (northern China).

In my opinion the text needs some editing by someone fluent in English. I am not, but I realized that in some paragraphs the language is not correct or it is difficult to follow.

Lines 36 – 37: the phrase “there are few records” seems unfinished. Few records of what ?

Lines 75-76: “The annual average daily maximum temperature... in July is...” Eliminate annual.

Line 86: “(Zhang 2004)”. It should be “Zhang and Demaree 2004)

Line 106: Xiao et al 2012 is not in the References

Line 121: Explain what is Yu-Fen-Cun

Line 200: Explain what is Yu-Xue-Fen-Cun

Line 276: Fang et al. 2015 ia nor in the References

Line 328: Gasparrini et al. 2015 is not in the References

Line 329: Cheng et al. 2019 is not in the References

Line 359: The four citations in this line are not in the References

Line 359 – 360: “Because they often occur at the same time as westerlies fluctuate more.” This phrase needs a better explanation

Line 362 – 363: “It is also unclear whether the fluctuations of the westerlies...” N-S fluctuations ? fluctuations in intensity? This whole paragraph (lines 358 – 366) needs a better explanation. What is the link between the westerlies and the heat waves in China ?

Lines 370 - 371: “in mining the climate eigenvalues” I don’t understand the meaning of this.

Table 5. 2003 France 15 days: 8.4 – 8.15 . These are 12 days, not 15 days.

References

Some of articles of the same principal author are not sorted by the year of publication (Brazdil et al.; Ge et al; Heeter et al, Wang et al, Wilson et al.

In the reference of Udías 1994, the name of the journal is missing.
